# Supplementary material for: Highly active chromium(iii) complexes based on tridentate pyrazolyl pyridyl ligands for ethylene polymerization and oligomerization
Source: Royal Society of Chemistry journal article supplement (doi:10.1039/c5dt00855g), 2015-01-01
Supplement: c5dt00855g1.pdf [file c5dt00855g1.pdf]

**Highly active chromium(III) complexes based on tridentate pyrazolyl pyridyl ligands  
for ethylene polymerization and oligomerization**

*Jong-Eun Park, Sung Kwon Kang, Jeong Oh Woo and Kyung-sun Son\**

Department of Chemistry, Chungnam National University, Daejeon 305-764, Korea.

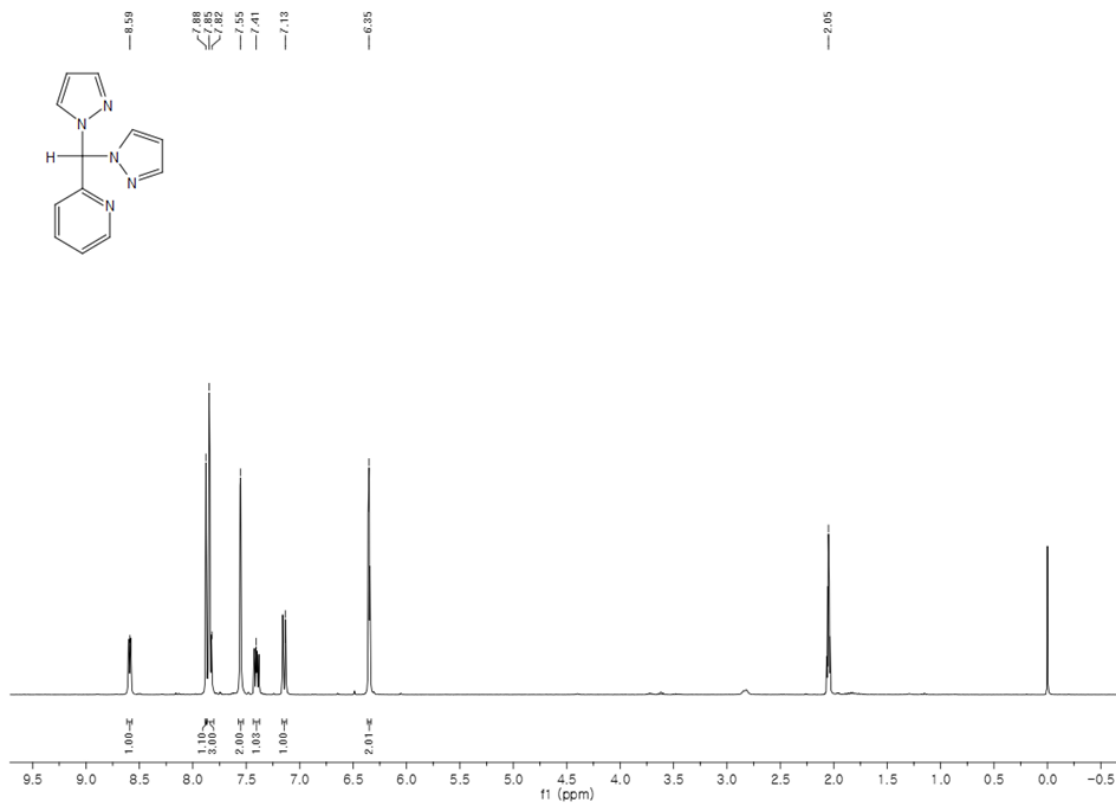

Figure S1 : <sup>1</sup>H NMR of Bis(1-pyrazolyl)(2-pyridyl)methane (L1) in Acetone-d<sub>6</sub>

**Figure S1.** <sup>1</sup>H NMR of L1 in acetone-d<sub>6</sub>

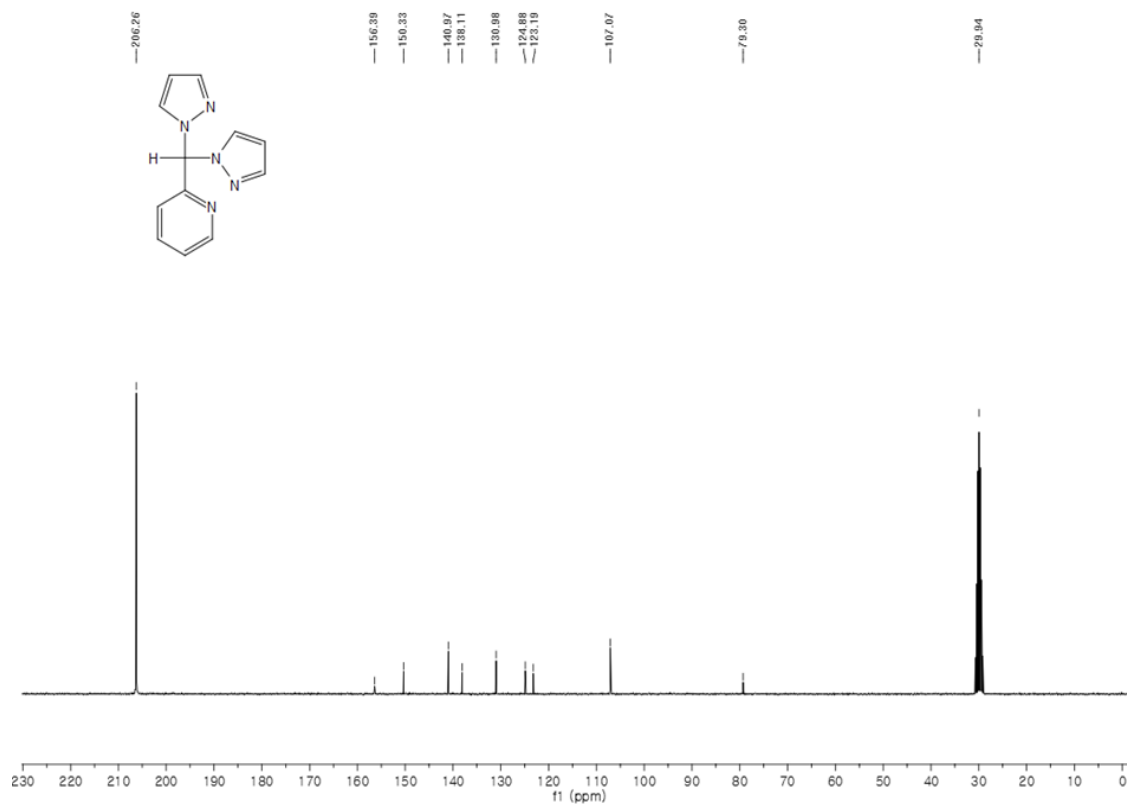

Figure S2 : <sup>13</sup>C NMR of Bis(1-pyrazolyl)(2-pyridyl)methane (L1) in Acetone-d<sub>6</sub>

**Figure S2.** <sup>13</sup>C NMR of L1 in acetone-d<sub>6</sub>

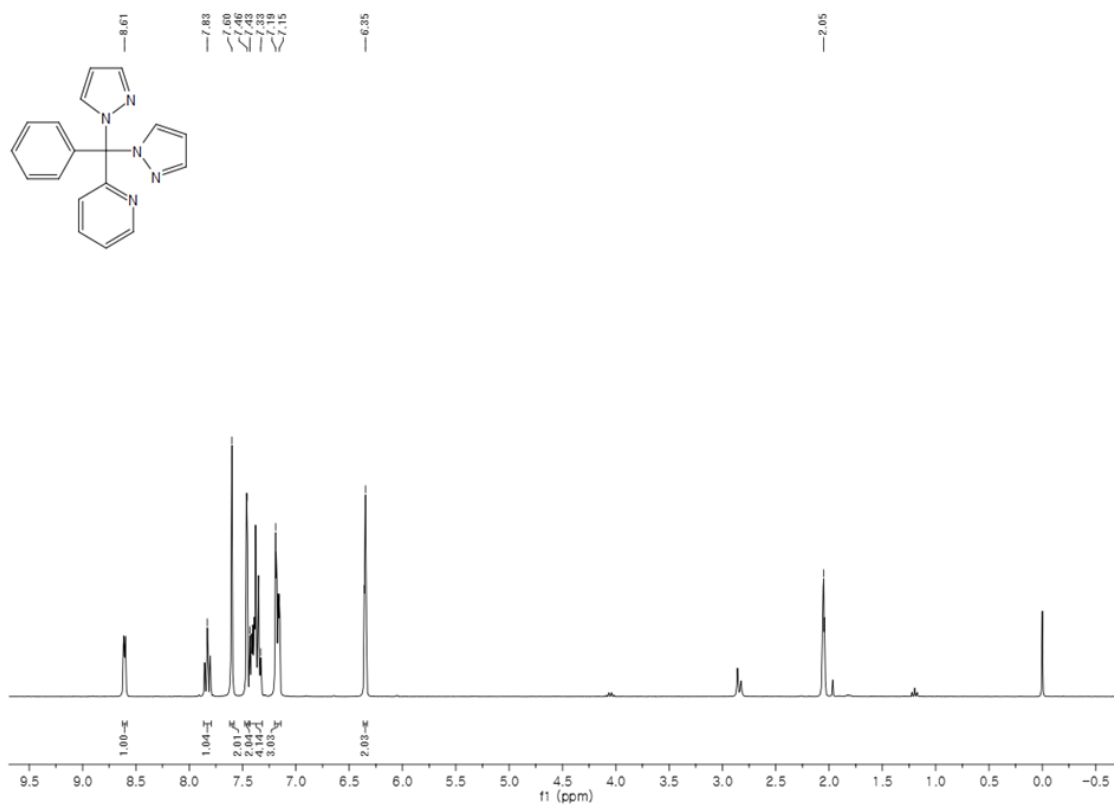

Figure S3 : <sup>1</sup>H NMR of (phenyl)bis(1-pyrazolyl)(2-pyridyl)methane (L2) in Acetone-d<sub>6</sub>

**Figure S3.** <sup>1</sup>H NMR of L2 in acetone-d<sub>6</sub>

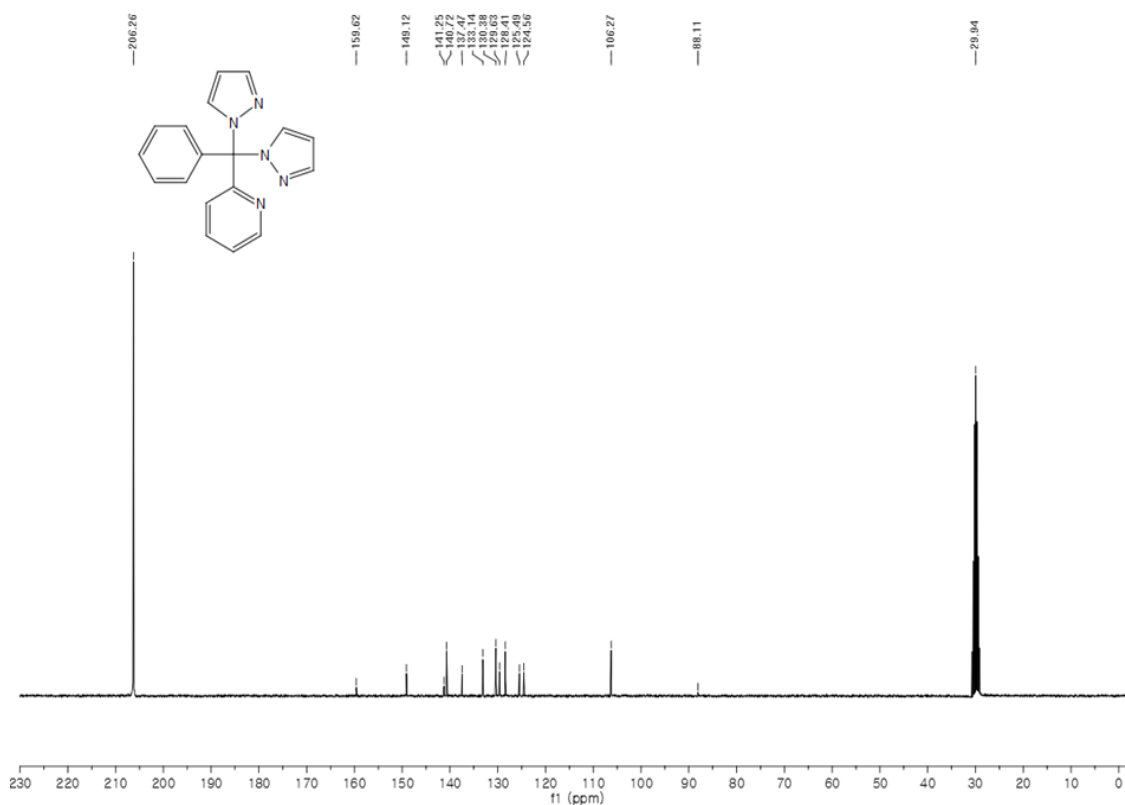

Figure S4 : <sup>13</sup>C NMR of (phenyl)bis(1-pyrazolyl)(2-pyridyl)methane (L2) in Acetone-d<sub>6</sub>

**Figure S4.** <sup>13</sup>C NMR of L2 in acetone-d<sub>6</sub>

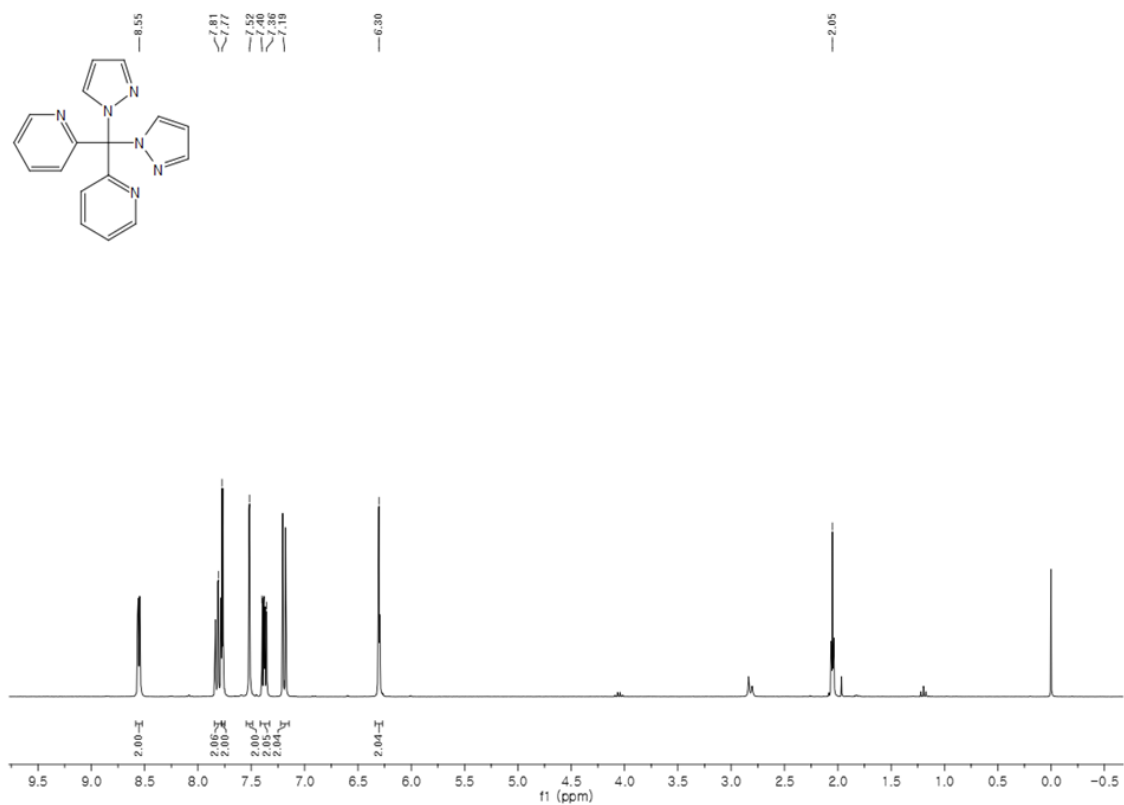

Figure S5 :  $^1\text{H}$  NMR of Bis(1-pyrazolyl)-Bis(2-pyridyl)methane (L3) in Acetone- $d_6$

**Figure S5.**  $^1\text{H}$  NMR of L3 in acetone- $d_6$

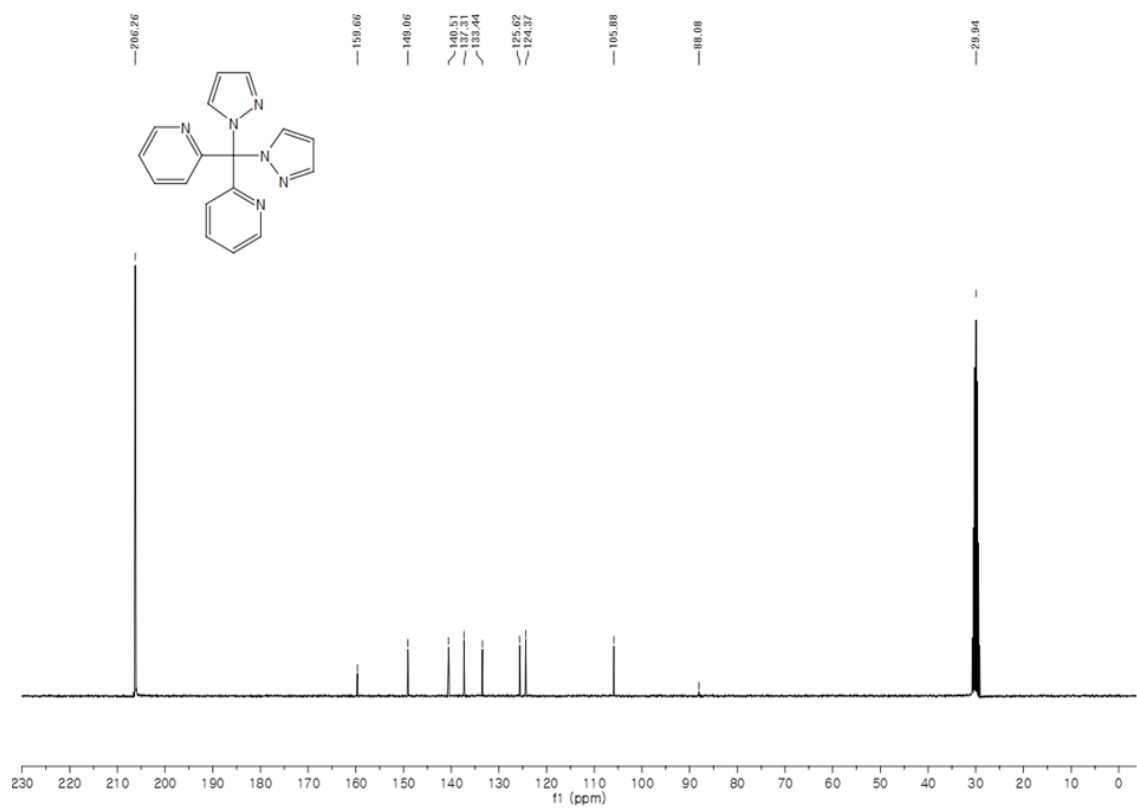

Figure S6 :  $^{13}\text{C}$  NMR of Bis(1-pyrazolyl)-Bis(2-pyridyl)methane (L3) in Acetone- $d_6$

**Figure S6.**  $^{13}\text{C}$  NMR of L3 in acetone- $d_6$

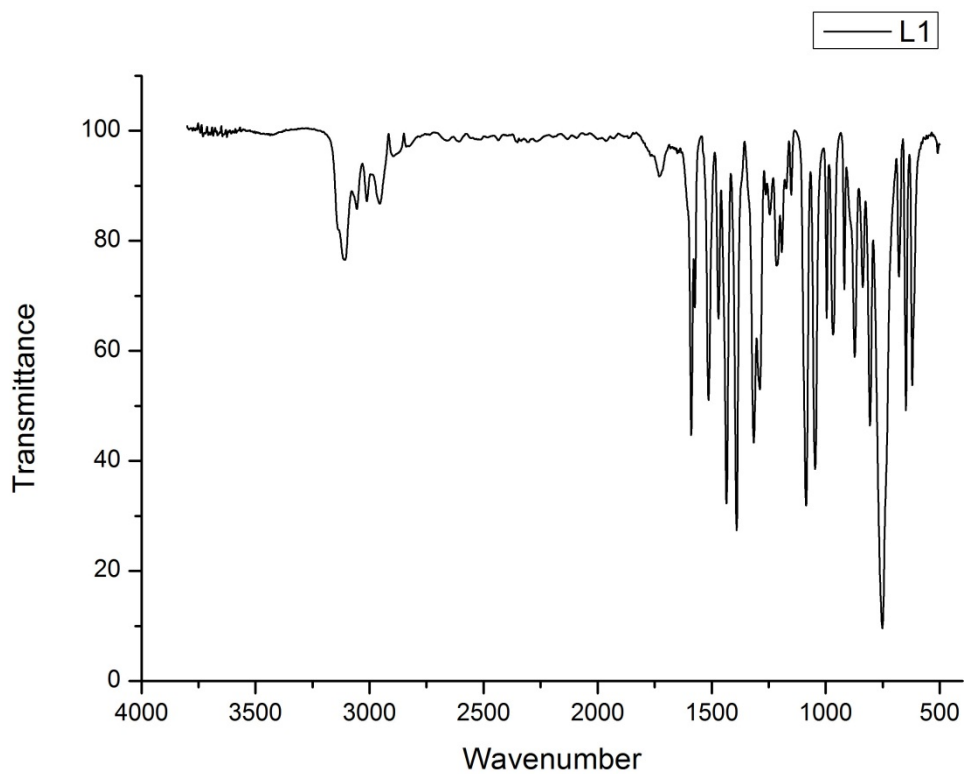

**Figure S7.** FT-IR spectrum of **L1**

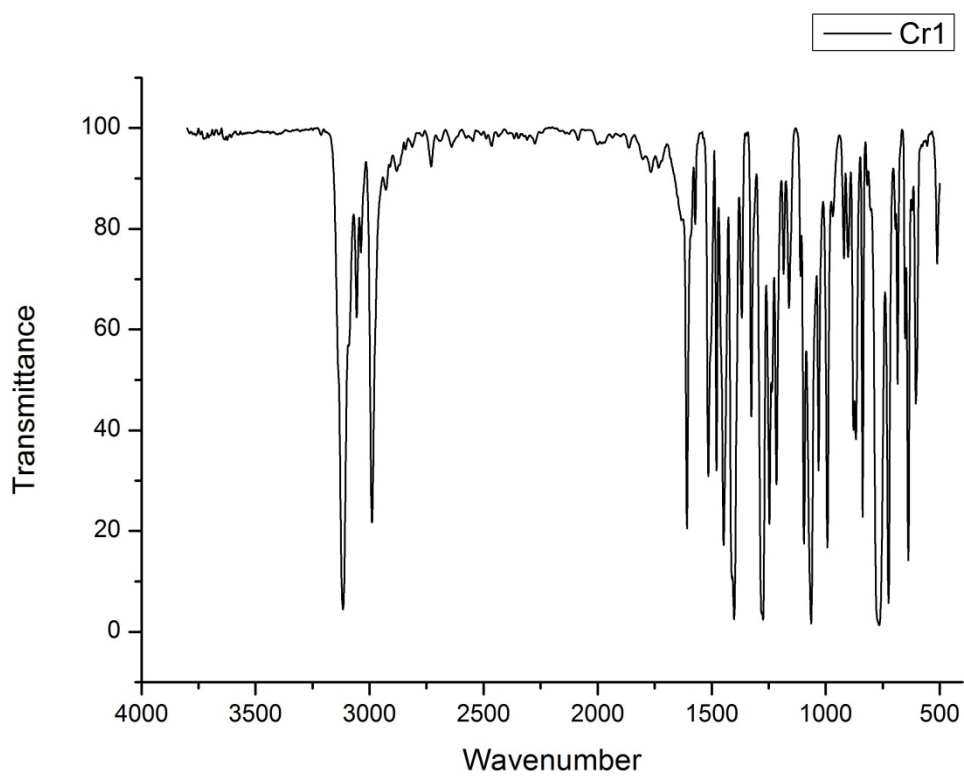

**Figure S8.** FT-IR spectrum of **Cr1**

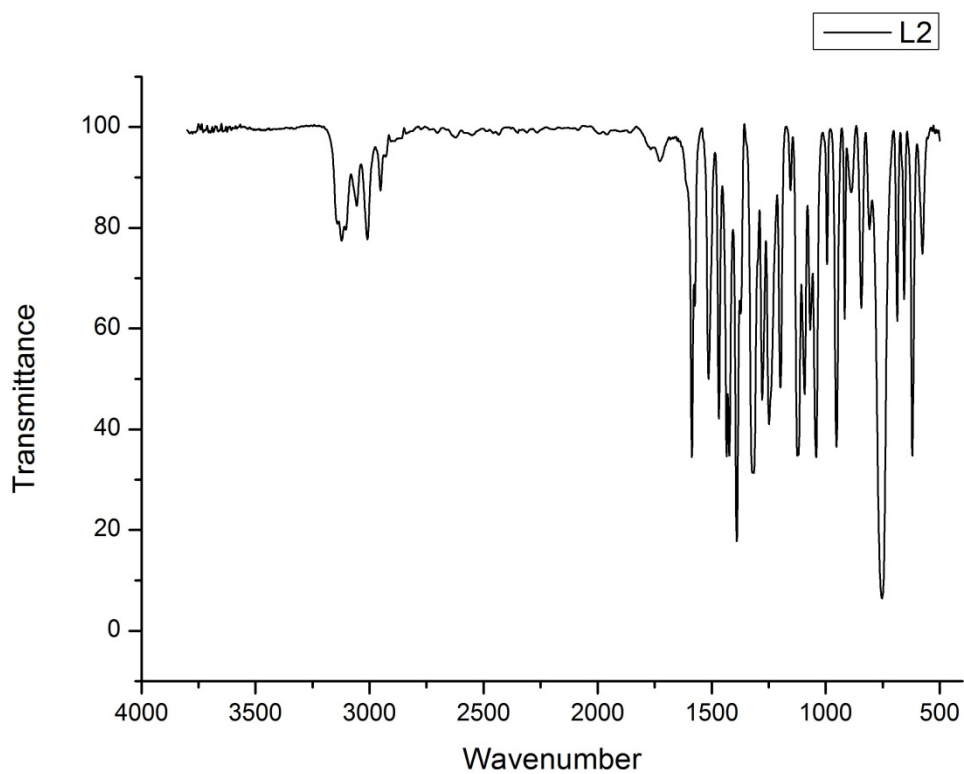

**Figure S9.** FT-IR spectrum of **L2**

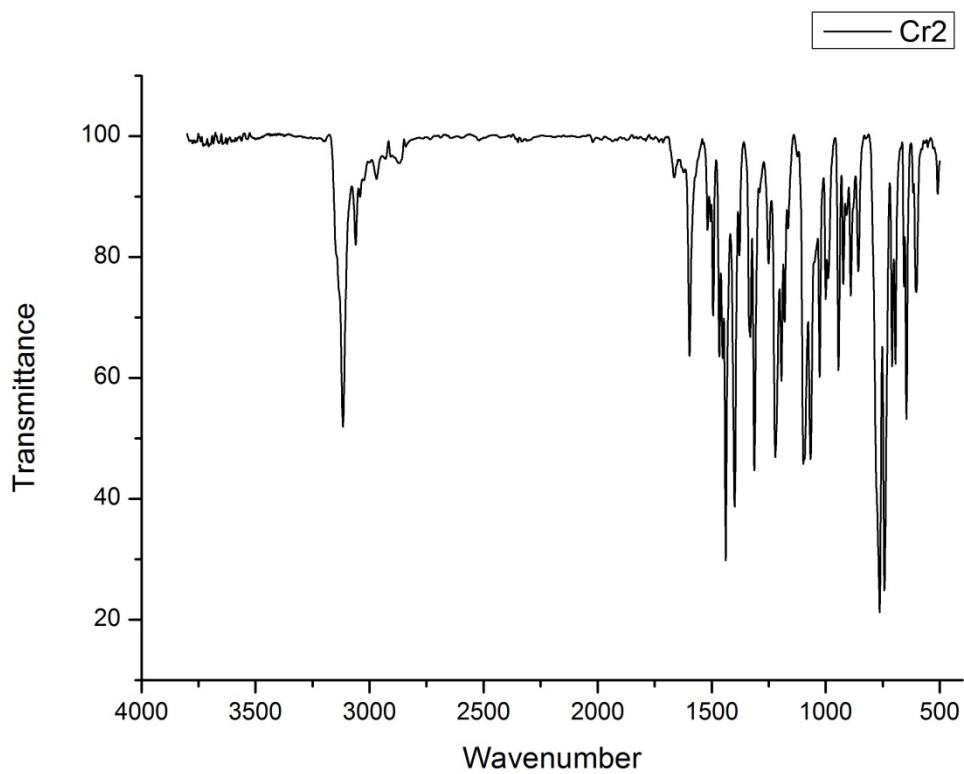

**Figure S10.** FT-IR spectrum of **Cr2**

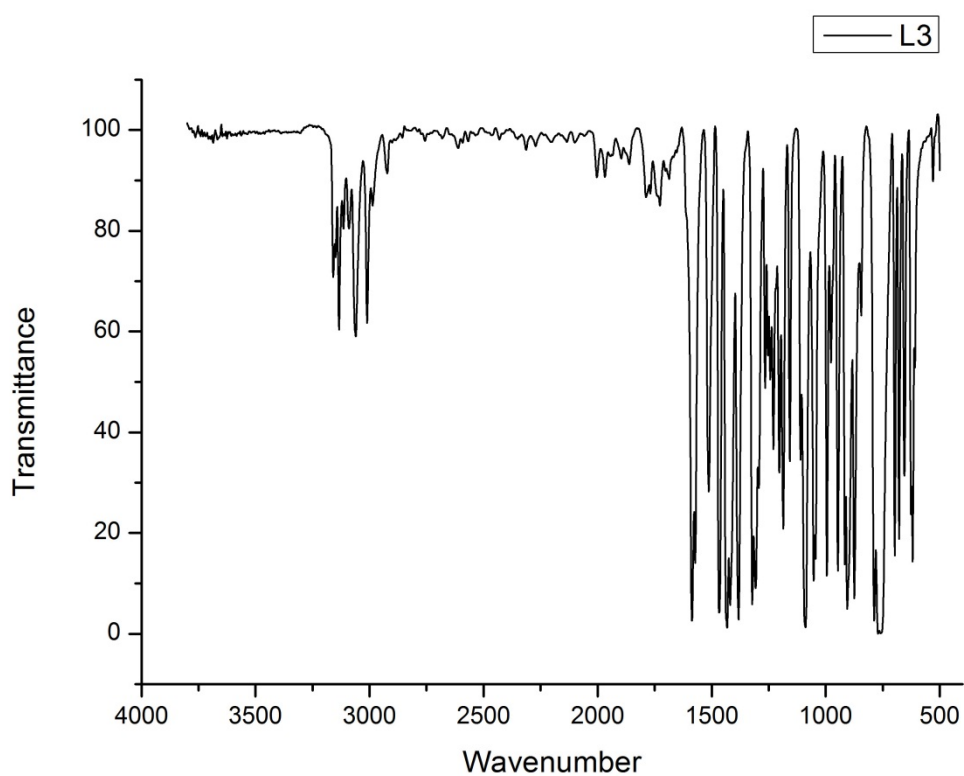

**Figure S11.** FT-IR spectrum of **L3**

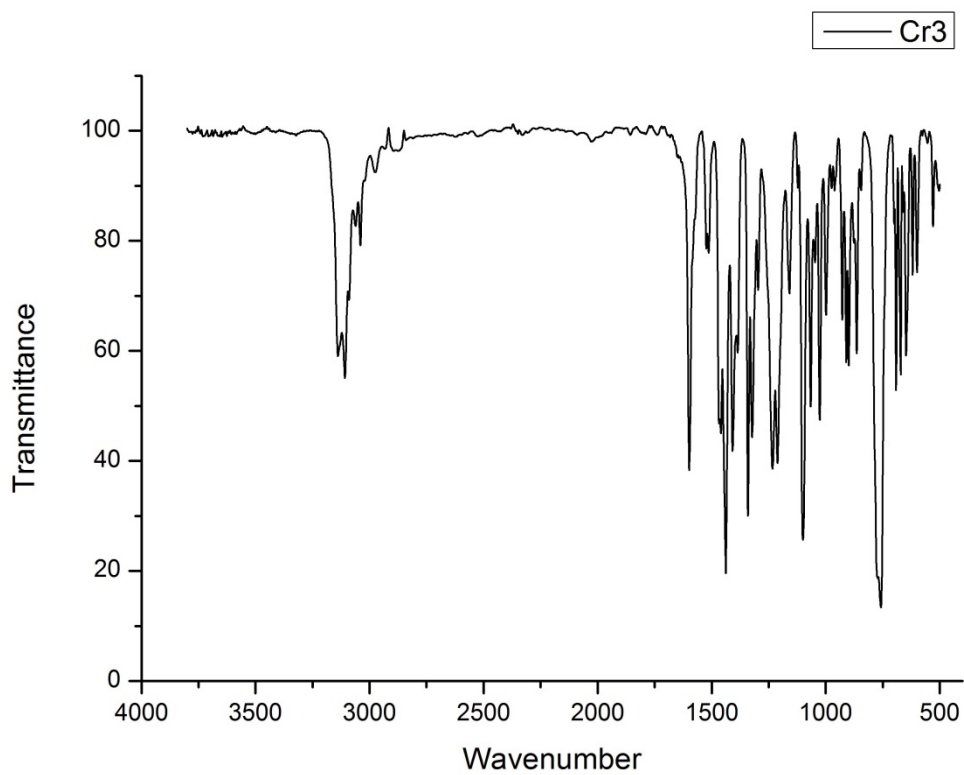

**Figure S12.** FT-IR spectrum of **Cr3**

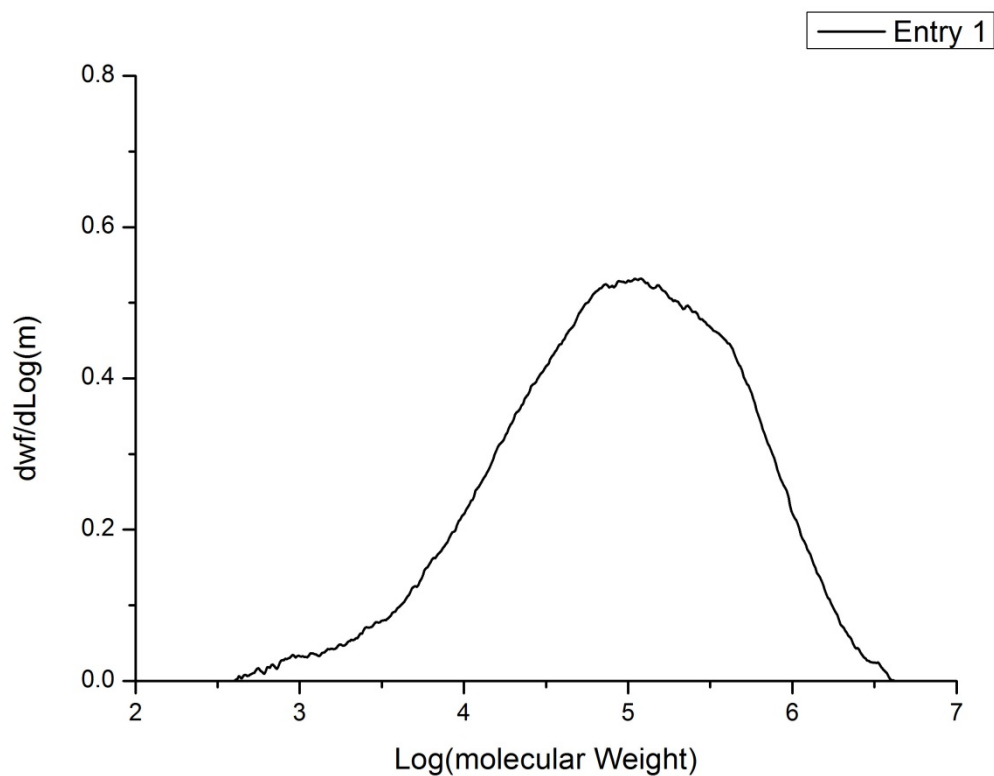

**Figure S13.** GPC trace of polyethylene (entry 1)

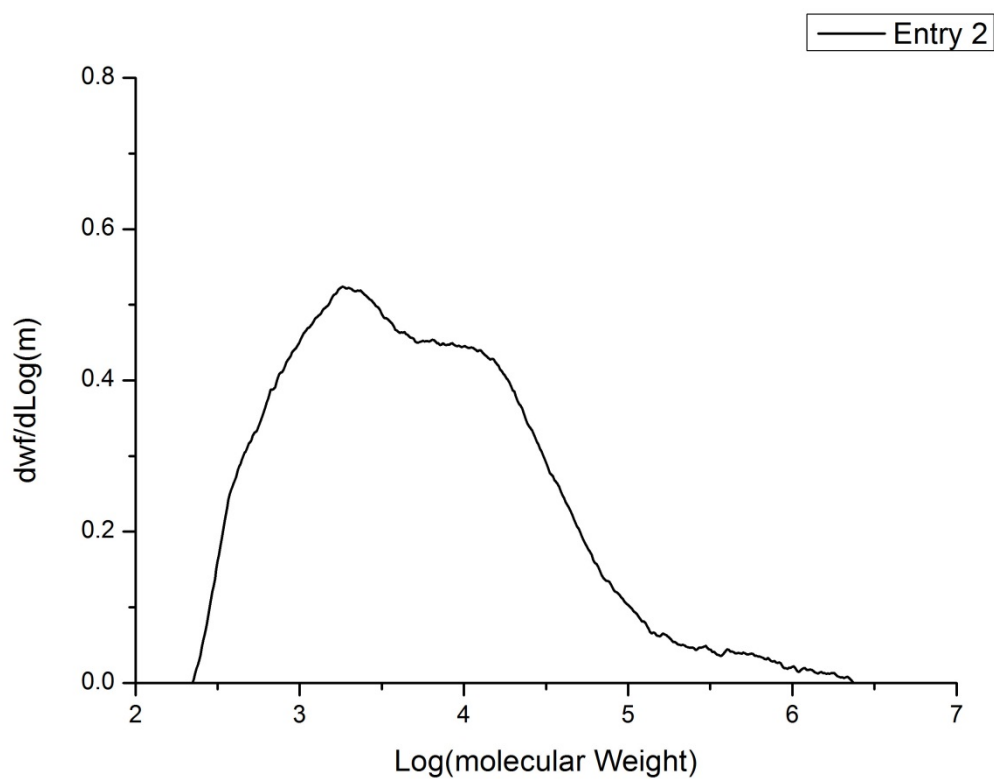

**Figure S14.** GPC trace of polyethylene (entry 2)



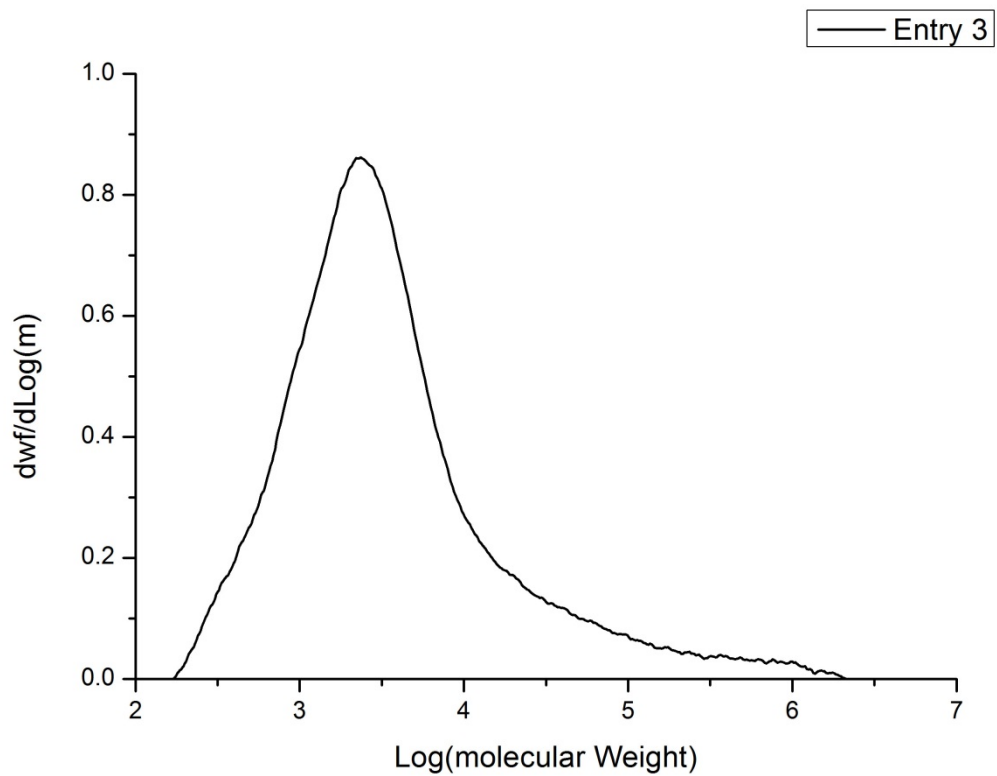

**Figure S15.** GPC trace of polyethylene (entry 3)

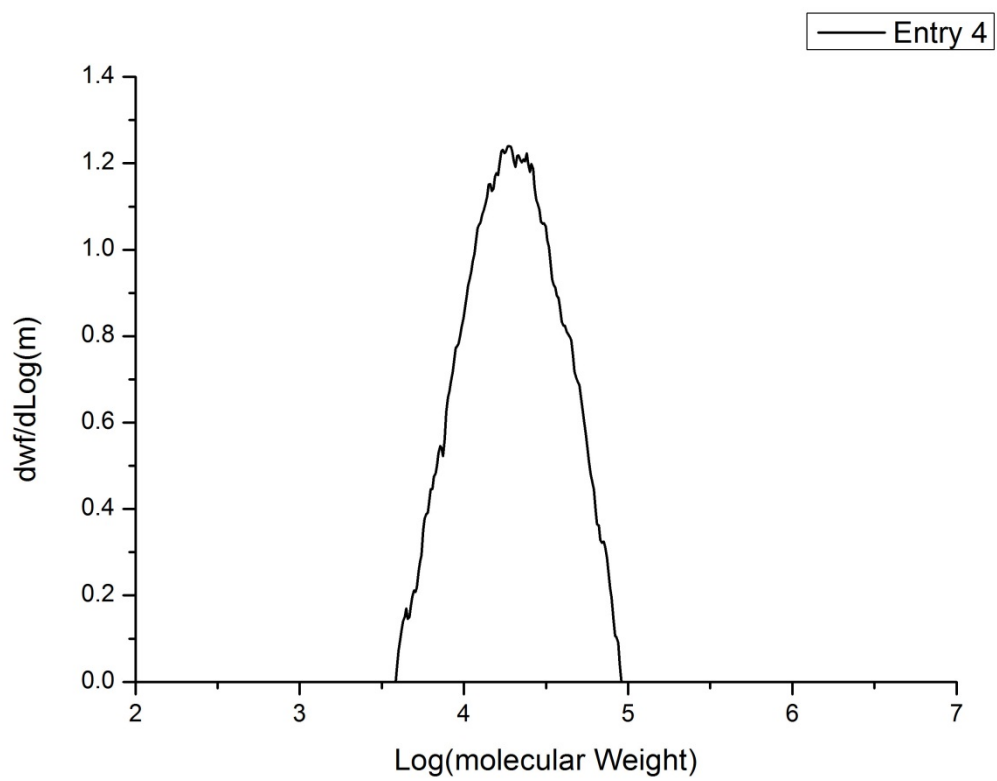

**Figure S16.** GPC trace of polyethylene (entry 4)

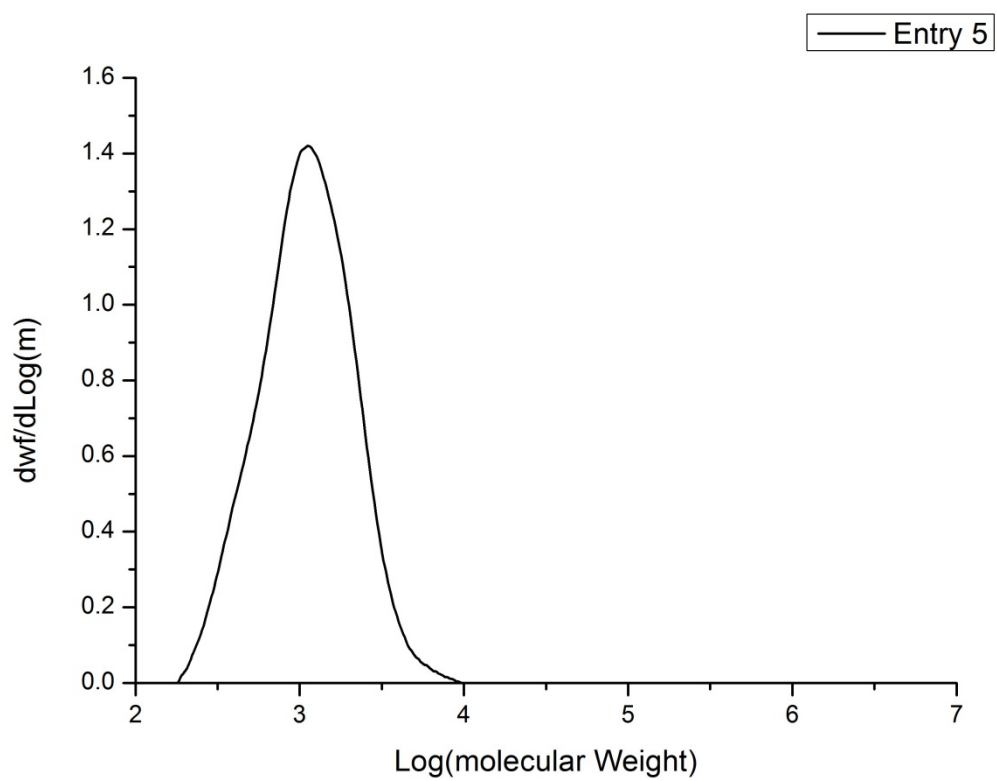

**Figure S17.** GPC trace of polyethylene (entry 5)

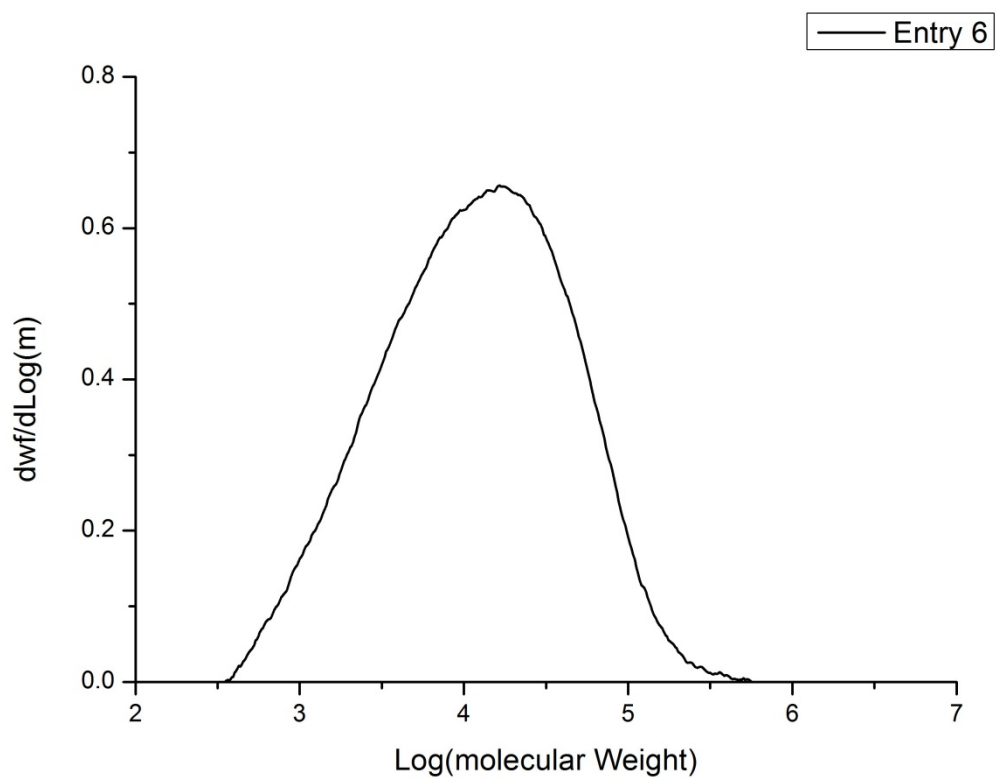

**Figure S18.** GPC trace of polyethylene (entry 6)

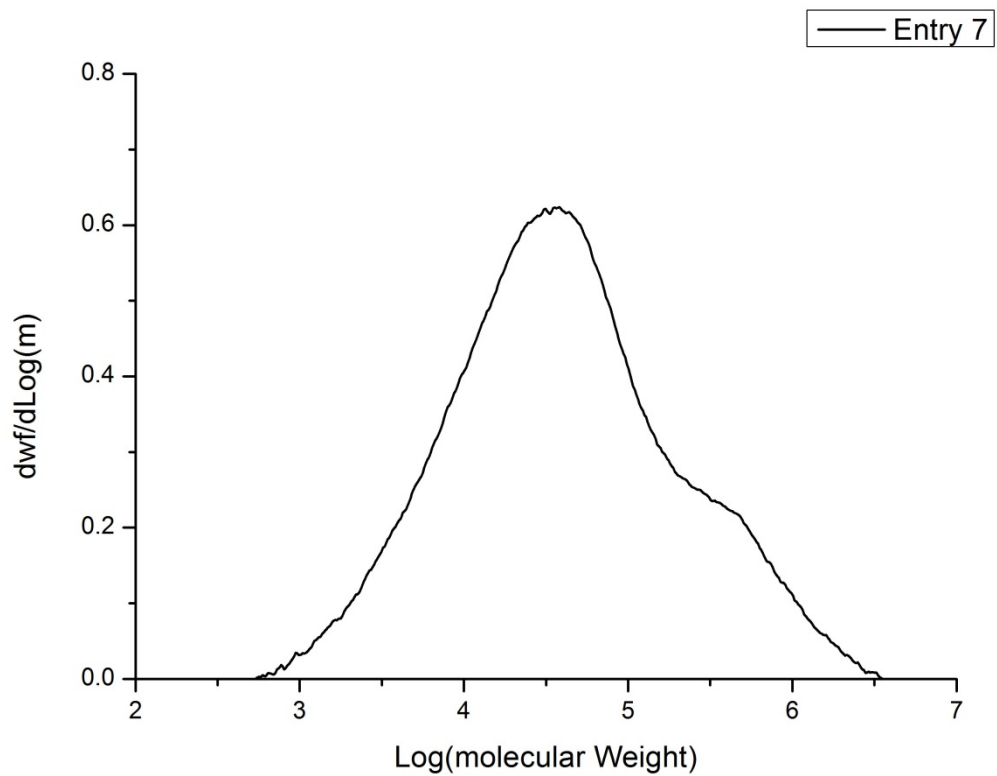

**Figure S19.** GPC trace of polyethylene (entry 7)

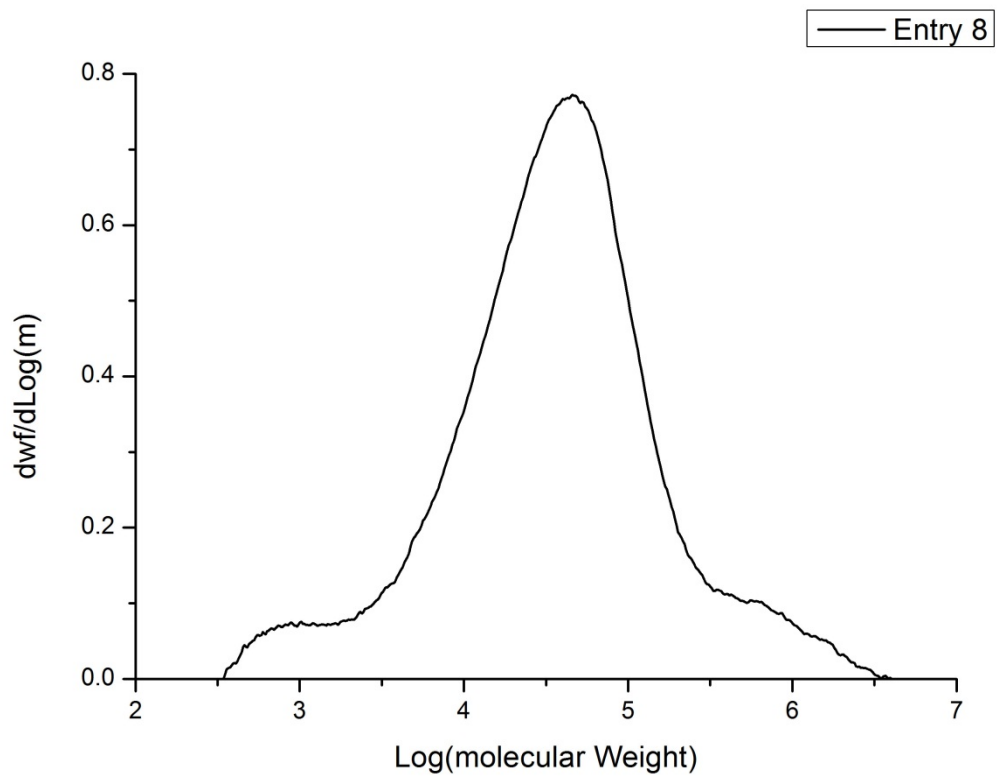

**Figure S20.** GPC trace of polyethylene (entry 8)

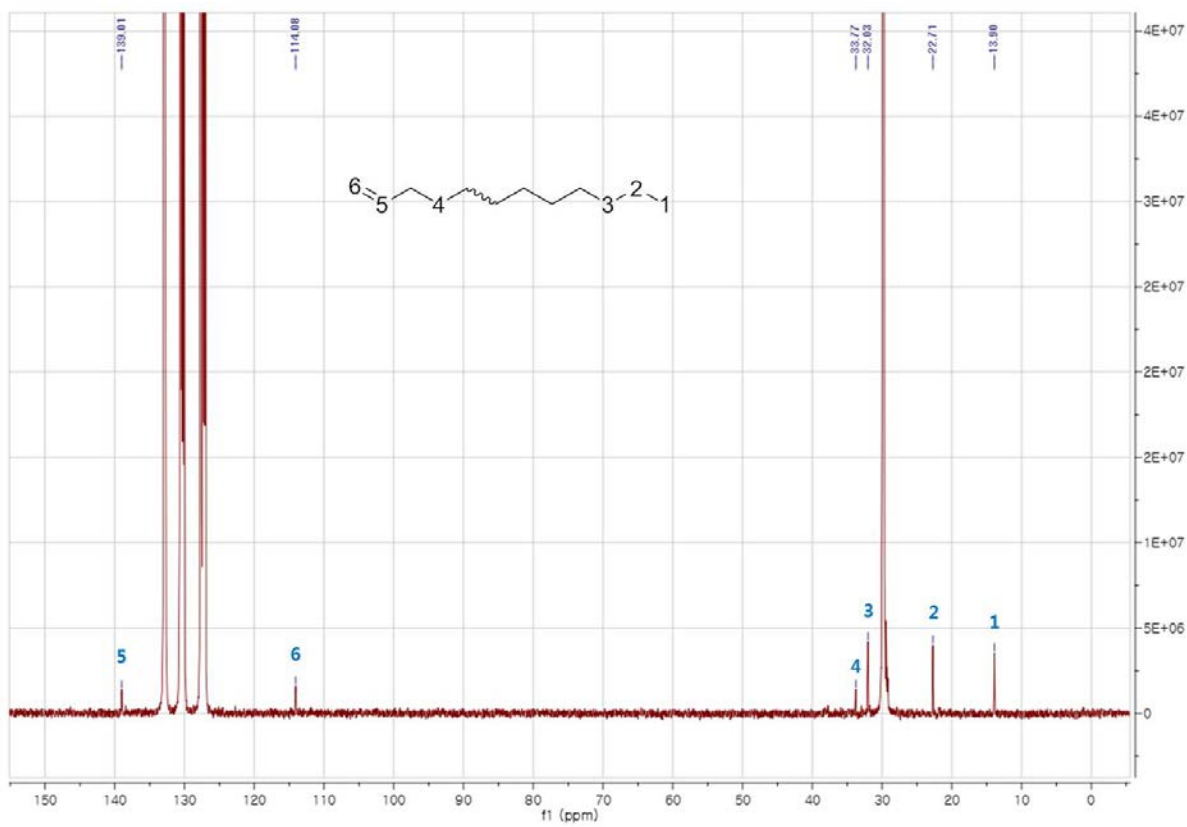

**Figure S21.** Representative  $^{13}\text{C}$  NMR spectrum of polyethylene (entry 8)

**Table S1.** Crystal data and structure refinement for **Cr2**

|                                   |                                                                                                                          |
|-----------------------------------|--------------------------------------------------------------------------------------------------------------------------|
| Empirical formula                 | C <sub>21</sub> H <sub>22</sub> Cl <sub>3</sub> Cr N <sub>6</sub> O                                                      |
| Formula weight                    | 532.79                                                                                                                   |
| Temperature                       | 296(2) K                                                                                                                 |
| Wavelength                        | 0.71073 Å                                                                                                                |
| Crystal system, space group       | Triclinic, P -1                                                                                                          |
| Unit cell dimensions              | a = 9.0372(2) Å alpha = 87.5459(15)°.<br>b = 12.0050(3) Å beta = 68.1978(12)°.<br>c = 12.1284(3) Å gamma = 71.7827(13)°. |
| Volume                            | 1156.46(5) Å <sup>3</sup>                                                                                                |
| Z, Calculated density             | 2, 1.530 Mg/m <sup>3</sup>                                                                                               |
| Absorption coefficient            | 0.868 mm <sup>-1</sup>                                                                                                   |
| F(000)                            | 546                                                                                                                      |
| Crystal size                      | 0.20 x 0.18 x 0.05 mm                                                                                                    |
| Theta range for data collection   | 1.792 to 28.308°.                                                                                                        |
| Limiting indices                  | -12<=h<=12, -16<=k<=16, -16<=l<=16                                                                                       |
| Reflections collected / unique    | 21213 / 5744 [R <sub>int</sub> = 0.0513]                                                                                 |
| Completeness to theta = 25.242    | 100.0 %                                                                                                                  |
| Absorption correction             | Semi-empirical from equivalents                                                                                          |
| Max. and min. transmission        | 0.947 and 0.831                                                                                                          |
| Refinement method                 | Full-matrix least-squares on F <sup>2</sup>                                                                              |
| Data / restraints / parameters    | 5744 / 0 / 288                                                                                                           |
| Goodness-of-fit on F <sup>2</sup> | 1.045                                                                                                                    |
| Final R indices [I>2sigma(I)]     | R <sub>1</sub> = 0.0493, wR <sub>2</sub> = 0.1187                                                                        |
| R indices (all data)              | R <sub>1</sub> = 0.0899, wR <sub>2</sub> = 0.1381                                                                        |
| Extinction coefficient            | n/a                                                                                                                      |
| Largest diff. peak and hole       | 0.694 and -0.387 e. Å <sup>-3</sup>                                                                                      |

**Table S2.** Selected bond lengths [ $\text{\AA}$ ] and angles [ $^\circ$ ] for **Cr2**

|                  |            |                   |          |
|------------------|------------|-------------------|----------|
| Cr(1)-N(5)       | 2.020(2)   | C(17)-H(17)       | 0.93     |
| Cr(1)-N(10)      | 2.095(3)   | C(18)-C(19)       | 1.313(6) |
| Cr(1)-N(15)      | 2.106(2)   | C(18)-H(18)       | 0.93     |
| Cr(1)-Cl(2)      | 2.2958(9)  | C(19)-C(20)       | 1.311(6) |
| Cr(1)-Cl(4)      | 2.2994(10) | C(19)-H(19)       | 0.93     |
| Cr(1)-Cl(3)      | 2.3103(10) | C(20)-H(20)       | 0.93     |
| N(5)-C(9)        | 1.325(4)   | C(21)-C(22)       | 1.529(4) |
| N(5)-N(6)        | 1.357(3)   | C(22)-C(27)       | 1.386(4) |
| N(6)-C(7)        | 1.359(4)   | C(22)-C(23)       | 1.390(4) |
| N(6)-C(21)       | 1.490(4)   | C(23)-C(24)       | 1.385(4) |
| C(7)-C(8)        | 1.370(4)   | C(23)-H(23)       | 0.93     |
| C(7)-H(7)        | 0.93       | C(24)-C(25)       | 1.374(5) |
| C(8)-C(9)        | 1.389(5)   | C(24)-H(24)       | 0.93     |
| C(8)-H(8)        | 0.93       | C(25)-C(26)       | 1.368(5) |
| C(9)-H(9)        | 0.93       | C(25)-H(25)       | 0.93     |
| N(10)-C(14)      | 1.326(4)   | C(26)-C(27)       | 1.390(5) |
| N(10)-N(11)      | 1.361(3)   | C(26)-H(26)       | 0.93     |
| N(11)-C(12)      | 1.361(4)   | C(27)-H(27)       | 0.93     |
| N(11)-C(21)      | 1.496(4)   | O(28)-C(29)       | 1.226(6) |
| C(12)-C(13)      | 1.432(6)   | C(29)-N(30)       | 1.308(6) |
| C(12)-H(12)      | 0.93       | C(29)-H(29)       | 0.93     |
| C(13)-C(14)      | 1.458(6)   | N(30)-C(32)       | 1.412(5) |
| C(13)-H(13)      | 0.93       | N(30)-C(31)       | 1.456(5) |
| C(14)-H(14)      | 0.93       | C(31)-H(31A)      | 0.96     |
| N(15)-C(20)      | 1.337(4)   | C(31)-H(31B)      | 0.96     |
| N(15)-C(16)      | 1.358(4)   | C(31)-H(31C)      | 0.96     |
| C(16)-C(17)      | 1.376(4)   | C(32)-H(32A)      | 0.96     |
| C(16)-C(21)      | 1.525(4)   | C(32)-H(32B)      | 0.96     |
| C(17)-C(18)      | 1.356(5)   | C(32)-H(32C)      | 0.96     |
| N(5)-Cr(1)-N(10) | 83.11(10)  | C(16)-C(17)-H(17) | 120.7    |
| N(5)-Cr(1)-N(15) | 81.74(10)  | C(19)-C(18)-C(17) | 122.6(4) |

|                   |            |                   |          |
|-------------------|------------|-------------------|----------|
| N(10)-Cr(1)-N(15) | 83.65(10)  | C(19)-C(18)-H(18) | 118.7    |
| N(5)-Cr(1)-Cl(2)  | 91.20(7)   | C(17)-C(18)-H(18) | 118.7    |
| N(10)-Cr(1)-Cl(2) | 172.46(8)  | C(20)-C(19)-C(18) | 116.6(4) |
| N(15)-Cr(1)-Cl(2) | 90.66(7)   | C(20)-C(19)-H(19) | 121.7    |
| N(5)-Cr(1)-Cl(4)  | 171.08(7)  | C(18)-C(19)-H(19) | 121.7    |
| N(10)-Cr(1)-Cl(4) | 90.63(8)   | C(19)-C(20)-N(15) | 125.5(4) |
| N(15)-Cr(1)-Cl(4) | 91.29(7)   | C(19)-C(20)-H(20) | 117.3    |
| Cl(2)-Cr(1)-Cl(4) | 94.46(4)   | N(15)-C(20)-H(20) | 117.3    |
| N(5)-Cr(1)-Cl(3)  | 90.34(7)   | N(6)-C(21)-N(11)  | 108.6(2) |
| N(10)-Cr(1)-Cl(3) | 90.82(8)   | N(6)-C(21)-C(16)  | 110.2(2) |
| N(15)-Cr(1)-Cl(3) | 170.81(7)  | N(11)-C(21)-C(16) | 105.1(2) |
| Cl(2)-Cr(1)-Cl(3) | 94.16(4)   | N(6)-C(21)-C(22)  | 104.4(2) |
| Cl(4)-Cr(1)-Cl(3) | 96.12(4)   | N(11)-C(21)-C(22) | 113.2(2) |
| C(9)-N(5)-N(6)    | 106.4(2)   | C(16)-C(21)-C(22) | 115.4(2) |
| C(9)-N(5)-Cr(1)   | 131.9(2)   | C(27)-C(22)-C(23) | 118.0(3) |
| N(6)-N(5)-Cr(1)   | 121.74(18) | C(27)-C(22)-C(21) | 120.9(3) |
| N(5)-N(6)-C(7)    | 110.0(2)   | C(23)-C(22)-C(21) | 119.9(3) |
| N(5)-N(6)-C(21)   | 121.0(2)   | C(24)-C(23)-C(22) | 120.9(3) |
| C(7)-N(6)-C(21)   | 129.0(2)   | C(24)-C(23)-H(23) | 119.5    |
| N(6)-C(7)-C(8)    | 107.4(3)   | C(22)-C(23)-H(23) | 119.5    |
| N(6)-C(7)-H(7)    | 126.3      | C(25)-C(24)-C(23) | 120.2(3) |
| C(8)-C(7)-H(7)    | 126.3      | C(25)-C(24)-H(24) | 119.9    |
| C(7)-C(8)-C(9)    | 105.4(3)   | C(23)-C(24)-H(24) | 119.9    |
| C(7)-C(8)-H(8)    | 127.3      | C(26)-C(25)-C(24) | 119.7(3) |
| C(9)-C(8)-H(8)    | 127.3      | C(26)-C(25)-H(25) | 120.2    |
| N(5)-C(9)-C(8)    | 110.8(3)   | C(24)-C(25)-H(25) | 120.2    |
| N(5)-C(9)-H(9)    | 124.6      | C(25)-C(26)-C(27) | 120.5(3) |
| C(8)-C(9)-H(9)    | 124.6      | C(25)-C(26)-H(26) | 119.7    |
| C(14)-N(10)-N(11) | 108.2(3)   | C(27)-C(26)-H(26) | 119.7    |
| C(14)-N(10)-Cr(1) | 127.5(2)   | C(22)-C(27)-C(26) | 120.6(3) |
| N(11)-N(10)-Cr(1) | 122.93(19) | C(22)-C(27)-H(27) | 119.7    |
| N(10)-N(11)-C(12) | 111.9(3)   | C(26)-C(27)-H(27) | 119.7    |
| N(10)-N(11)-C(21) | 117.3(2)   | O(28)-C(29)-N(30) | 122.6(5) |

|                   |            |                     |          |
|-------------------|------------|---------------------|----------|
| C(12)-N(11)-C(21) | 129.4(3)   | O(28)-C(29)-H(29)   | 118.7    |
| N(11)-C(12)-C(13) | 106.0(3)   | N(30)-C(29)-H(29)   | 118.7    |
| N(11)-C(12)-H(12) | 127        | C(29)-N(30)-C(32)   | 122.1(4) |
| C(13)-C(12)-H(12) | 127        | C(29)-N(30)-C(31)   | 120.5(4) |
| C(12)-C(13)-C(14) | 104.5(3)   | C(32)-N(30)-C(31)   | 117.3(4) |
| C(12)-C(13)-H(13) | 127.7      | N(30)-C(31)-H(31A)  | 109.5    |
| C(14)-C(13)-H(13) | 127.7      | N(30)-C(31)-H(31B)  | 109.5    |
| N(10)-C(14)-C(13) | 109.1(3)   | H(31A)-C(31)-H(31B) | 109.5    |
| N(10)-C(14)-H(14) | 125.4      | N(30)-C(31)-H(31C)  | 109.5    |
| C(13)-C(14)-H(14) | 125.4      | H(31A)-C(31)-H(31C) | 109.5    |
| C(20)-N(15)-C(16) | 117.3(3)   | H(31B)-C(31)-H(31C) | 109.5    |
| C(20)-N(15)-Cr(1) | 119.2(2)   | N(30)-C(32)-H(32A)  | 109.5    |
| C(16)-N(15)-Cr(1) | 122.51(19) | N(30)-C(32)-H(32B)  | 109.5    |
| N(15)-C(16)-C(17) | 118.6(3)   | H(32A)-C(32)-H(32B) | 109.5    |
| N(15)-C(16)-C(21) | 116.6(2)   | N(30)-C(32)-H(32C)  | 109.5    |
| C(17)-C(16)-C(21) | 124.4(3)   | H(32A)-C(32)-H(32C) | 109.5    |
| C(18)-C(17)-C(16) | 118.6(3)   | H(32B)-C(32)-H(32C) | 109.5    |
| C(18)-C(17)-H(17) | 120.7      |                     |          |



**Table S3. Crystal data and structure refinement for Cr3**

|                                   |                                                                                                          |
|-----------------------------------|----------------------------------------------------------------------------------------------------------|
| Empirical formula                 | C <sub>23</sub> H <sub>28</sub> Cl <sub>3</sub> Cr N <sub>8</sub> O <sub>2</sub>                         |
| Formula weight                    | 606.88                                                                                                   |
| Temperature                       | 296(2) K                                                                                                 |
| Wavelength                        | 0.71073 Å                                                                                                |
| Crystal system, space group       | Monoclinic, P 21/c                                                                                       |
| Unit cell dimensions              | a = 11.4170(13) Å alpha = 90°.<br>b = 14.1673(15) Å beta = 98.684(2)°.<br>c = 16.8852(19) Å gamma = 90°. |
| Volume                            | 2699.8(5) Å <sup>3</sup>                                                                                 |
| Z, Calculated density             | 4, 1.493 Mg/m <sup>3</sup>                                                                               |
| Absorption coefficient            | 0.758 mm <sup>-1</sup>                                                                                   |
| F(000)                            | 1252                                                                                                     |
| Crystal size                      | 0.12 x 0.10 x 0.08 mm                                                                                    |
| Theta range for data collection   | 1.804 to 25.499°.                                                                                        |
| Limiting indices                  | -13<=h<=13, -17<=k<=17, -20<=l<=20                                                                       |
| Reflections collected / unique    | 21459 / 5019 [R <sub>int</sub> = 0.1085]                                                                 |
| Completeness to theta = 25.242    | 100.0 %                                                                                                  |
| Absorption correction             | Semi-empirical from equivalents                                                                          |
| Max. and min. transmission        | 0.921 and 0.903                                                                                          |
| Refinement method                 | Full-matrix least-squares on F <sup>2</sup>                                                              |
| Data / restraints / parameters    | 5019 / 0 / 333                                                                                           |
| Goodness-of-fit on F <sup>2</sup> | 1.049                                                                                                    |
| Final R indices [I>2sigma(I)]     | R <sub>1</sub> = 0.0712, wR <sub>2</sub> = 0.1725                                                        |
| R indices (all data)              | R <sub>1</sub> = 0.1238, wR <sub>2</sub> = 0.2055                                                        |
| Extinction coefficient            | n/a                                                                                                      |
| Largest diff. peak and hole       | 1.823 and -0.548 e. Å <sup>-3</sup>                                                                      |

**Table S4. Selected bond lengths [ $\text{\AA}$ ] and angles [ $^\circ$ ] for Cr3**

|             |            |              |           |
|-------------|------------|--------------|-----------|
| Cr(1)-N(5)  | 2.036(5)   | C(20)-C(21)  | 1.337(9)  |
| Cr(1)-N(10) | 2.106(5)   | C(20)-H(20)  | 0.93      |
| Cr(1)-N(16) | 2.115(5)   | C(21)-H(21)  | 0.93      |
| Cr(1)-Cl(3) | 2.2946(18) | C(22)-N(23)  | 1.472(7)  |
| Cr(1)-Cl(2) | 2.3026(17) | N(23)-N(24)  | 1.358(7)  |
| Cr(1)-Cl(4) | 2.3087(18) | N(23)-C(27)  | 1.375(8)  |
| N(5)-C(9)   | 1.337(8)   | N(24)-C(25)  | 1.311(8)  |
| N(5)-N(6)   | 1.363(6)   | C(25)-C(26)  | 1.496(11) |
| N(6)-C(7)   | 1.361(7)   | C(25)-H(25)  | 0.93      |
| N(6)-C(22)  | 1.510(7)   | C(26)-C(27)  | 1.418(10) |
| C(7)-C(8)   | 1.434(10)  | C(26)-H(26)  | 0.93      |
| C(7)-H(7)   | 0.93       | C(27)-H(27)  | 0.93      |
| C(8)-C(9)   | 1.580(11)  | O(28)-C(29)  | 1.229(10) |
| C(8)-H(8)   | 0.93       | C(29)-N(30)  | 1.347(10) |
| C(9)-H(9)   | 0.93       | C(29)-H(29)  | 0.93      |
| N(10)-C(15) | 1.325(8)   | N(30)-C(32)  | 1.419(10) |
| N(10)-C(11) | 1.366(7)   | N(30)-C(31)  | 1.429(9)  |
| C(11)-C(12) | 1.379(8)   | C(31)-H(31A) | 0.96      |
| C(11)-C(22) | 1.492(8)   | C(31)-H(31B) | 0.96      |
| C(12)-C(13) | 1.339(10)  | C(31)-H(31C) | 0.96      |
| C(12)-H(12) | 0.93       | C(32)-H(32A) | 0.96      |
| C(13)-C(14) | 1.229(12)  | C(32)-H(32B) | 0.96      |
| C(13)-H(13) | 0.93       | C(32)-H(32C) | 0.96      |
| C(14)-C(15) | 1.301(11)  | O(33)-C(34)  | 1.226(10) |
| C(14)-H(14) | 0.93       | C(34)-N(35)  | 1.319(10) |
| C(15)-H(15) | 0.93       | C(34)-H(34)  | 0.93      |
| N(16)-C(21) | 1.329(7)   | N(35)-C(37)  | 1.437(11) |
| N(16)-C(17) | 1.355(7)   | N(35)-C(36)  | 1.445(11) |
| C(17)-C(18) | 1.366(8)   | C(36)-H(36A) | 0.96      |

|                   |            |                   |          |
|-------------------|------------|-------------------|----------|
| C(17)-C(22)       | 1.519(8)   | C(36)-H(36B)      | 0.96     |
| C(18)-C(19)       | 1.364(9)   | C(36)-H(36C)      | 0.96     |
| C(18)-H(18)       | 0.93       | C(37)-H(37A)      | 0.96     |
| C(19)-C(20)       | 1.306(10)  | C(37)-H(37B)      | 0.96     |
| C(19)-H(19)       | 0.93       | C(37)-H(37C)      | 0.96     |
| N(5)-Cr(1)-N(10)  | 83.38(18)  | C(19)-C(20)-H(20) | 121      |
| N(5)-Cr(1)-N(16)  | 83.50(18)  | C(21)-C(20)-H(20) | 121      |
| N(10)-Cr(1)-N(16) | 84.29(18)  | N(16)-C(21)-C(20) | 124.1(6) |
| N(5)-Cr(1)-Cl(3)  | 90.53(14)  | N(16)-C(21)-H(21) | 118      |
| N(10)-Cr(1)-Cl(3) | 90.88(14)  | C(20)-C(21)-H(21) | 118      |
| N(16)-Cr(1)-Cl(3) | 172.71(14) | N(23)-C(22)-C(11) | 112.2(4) |
| N(5)-Cr(1)-Cl(2)  | 91.32(14)  | N(23)-C(22)-N(6)  | 105.0(4) |
| N(10)-Cr(1)-Cl(2) | 172.44(14) | C(11)-C(22)-N(6)  | 109.8(4) |
| N(16)-Cr(1)-Cl(2) | 89.77(13)  | N(23)-C(22)-C(17) | 111.4(4) |
| Cl(3)-Cr(1)-Cl(2) | 94.56(6)   | C(11)-C(22)-C(17) | 106.2(4) |
| N(5)-Cr(1)-Cl(4)  | 172.33(14) | N(6)-C(22)-C(17)  | 112.4(4) |
| N(10)-Cr(1)-Cl(4) | 90.61(13)  | N(24)-N(23)-C(27) | 112.9(5) |
| N(16)-Cr(1)-Cl(4) | 91.19(13)  | N(24)-N(23)-C(22) | 117.9(5) |
| Cl(3)-Cr(1)-Cl(4) | 94.33(7)   | C(27)-N(23)-C(22) | 125.4(5) |
| Cl(2)-Cr(1)-Cl(4) | 94.20(7)   | C(25)-N(24)-N(23) | 107.4(5) |
| C(9)-N(5)-N(6)    | 110.2(5)   | N(24)-C(25)-C(26) | 110.0(6) |
| C(9)-N(5)-Cr(1)   | 129.6(4)   | N(24)-C(25)-H(25) | 125      |
| N(6)-N(5)-Cr(1)   | 120.0(3)   | C(26)-C(25)-H(25) | 125      |
| C(7)-N(6)-N(5)    | 113.3(5)   | C(27)-C(26)-C(25) | 103.4(6) |
| C(7)-N(6)-C(22)   | 126.6(5)   | C(27)-C(26)-H(26) | 128.3    |
| N(5)-N(6)-C(22)   | 120.1(4)   | C(25)-C(26)-H(26) | 128.3    |
| N(6)-C(7)-C(8)    | 107.4(6)   | N(23)-C(27)-C(26) | 106.1(6) |
| N(6)-C(7)-H(7)    | 126.3      | N(23)-C(27)-H(27) | 126.9    |
| C(8)-C(7)-H(7)    | 126.3      | C(26)-C(27)-H(27) | 126.9    |

|                   |           |                     |          |
|-------------------|-----------|---------------------|----------|
| C(7)-C(8)-C(9)    | 103.2(6)  | O(28)-C(29)-N(30)   | 124.9(8) |
| C(7)-C(8)-H(8)    | 128.4     | O(28)-C(29)-H(29)   | 117.6    |
| C(9)-C(8)-H(8)    | 128.4     | N(30)-C(29)-H(29)   | 117.6    |
| N(5)-C(9)-C(8)    | 105.9(6)  | C(29)-N(30)-C(32)   | 120.9(7) |
| N(5)-C(9)-H(9)    | 127.1     | C(29)-N(30)-C(31)   | 119.4(7) |
| C(8)-C(9)-H(9)    | 127.1     | C(32)-N(30)-C(31)   | 119.7(7) |
| C(15)-N(10)-C(11) | 114.2(5)  | N(30)-C(31)-H(31A)  | 109.5    |
| C(15)-N(10)-Cr(1) | 122.4(4)  | N(30)-C(31)-H(31B)  | 109.5    |
| C(11)-N(10)-Cr(1) | 122.5(4)  | H(31A)-C(31)-H(31B) | 109.5    |
| N(10)-C(11)-C(12) | 117.4(5)  | N(30)-C(31)-H(31C)  | 109.5    |
| N(10)-C(11)-C(22) | 115.3(5)  | H(31A)-C(31)-H(31C) | 109.5    |
| C(12)-C(11)-C(22) | 127.0(5)  | H(31B)-C(31)-H(31C) | 109.5    |
| C(13)-C(12)-C(11) | 118.3(7)  | N(30)-C(32)-H(32A)  | 109.5    |
| C(13)-C(12)-H(12) | 120.9     | N(30)-C(32)-H(32B)  | 109.5    |
| C(11)-C(12)-H(12) | 120.9     | H(32A)-C(32)-H(32B) | 109.5    |
| C(14)-C(13)-C(12) | 126.6(10) | N(30)-C(32)-H(32C)  | 109.5    |
| C(14)-C(13)-H(13) | 116.7     | H(32A)-C(32)-H(32C) | 109.5    |
| C(12)-C(13)-H(13) | 116.7     | H(32B)-C(32)-H(32C) | 109.5    |
| C(13)-C(14)-C(15) | 113.2(10) | O(33)-C(34)-N(35)   | 125.3(8) |
| C(13)-C(14)-H(14) | 123.4     | O(33)-C(34)-H(34)   | 117.4    |
| C(15)-C(14)-H(14) | 123.4     | N(35)-C(34)-H(34)   | 117.4    |
| C(14)-C(15)-N(10) | 130.1(8)  | C(34)-N(35)-C(37)   | 121.0(8) |
| C(14)-C(15)-H(15) | 114.9     | C(34)-N(35)-C(36)   | 121.1(8) |
| N(10)-C(15)-H(15) | 114.9     | C(37)-N(35)-C(36)   | 117.9(8) |
| C(21)-N(16)-C(17) | 117.7(5)  | N(35)-C(36)-H(36A)  | 109.5    |
| C(21)-N(16)-Cr(1) | 119.5(4)  | N(35)-C(36)-H(36B)  | 109.5    |
| C(17)-N(16)-Cr(1) | 122.0(4)  | H(36A)-C(36)-H(36B) | 109.5    |
| N(16)-C(17)-C(18) | 119.1(5)  | N(35)-C(36)-H(36C)  | 109.5    |
| N(16)-C(17)-C(22) | 115.7(5)  | H(36A)-C(36)-H(36C) | 109.5    |
| C(18)-C(17)-C(22) | 124.7(5)  | H(36B)-C(36)-H(36C) | 109.5    |

|                   |          |                     |       |
|-------------------|----------|---------------------|-------|
| C(19)-C(18)-C(17) | 119.4(6) | N(35)-C(37)-H(37A)  | 109.5 |
| C(19)-C(18)-H(18) | 120.3    | N(35)-C(37)-H(37B)  | 109.5 |
| C(17)-C(18)-H(18) | 120.3    | H(37A)-C(37)-H(37B) | 109.5 |
| C(20)-C(19)-C(18) | 121.0(7) | N(35)-C(37)-H(37C)  | 109.5 |
| C(20)-C(19)-H(19) | 119.5    | H(37A)-C(37)-H(37C) | 109.5 |
| C(18)-C(19)-H(19) | 119.5    | H(37B)-C(37)-H(37C) | 109.5 |
| C(19)-C(20)-C(21) | 118.0(7) |                     |       |
